# Supplementary material for: Modulating the optical properties of the AIE fluophor confined within UiO-66's nanochannels for chemical sensing
Source: Royal Society of Chemistry journal article supplement (doi:10.1039/c6nr05600h), 2016-01-01
Supplement: c6nr05600h1.pdf [file c6nr05600h1.pdf]

## Supporting Information

### Modulating optical properties of AIE fluophor confined within UiO-66's nanochannels for chemical sensing

Zhixiang Lu,<sup>a</sup> Mingjiang Wu,<sup>a</sup> Shuang Wu,<sup>b</sup> Shaoxiong Yang,<sup>a</sup> Yuan Li,<sup>a</sup> Xiaolan Liu,<sup>a</sup> Liyan Zheng,<sup>\*a</sup> Qie Cao,<sup>\*a</sup> and Zhongtao Ding<sup>a</sup>

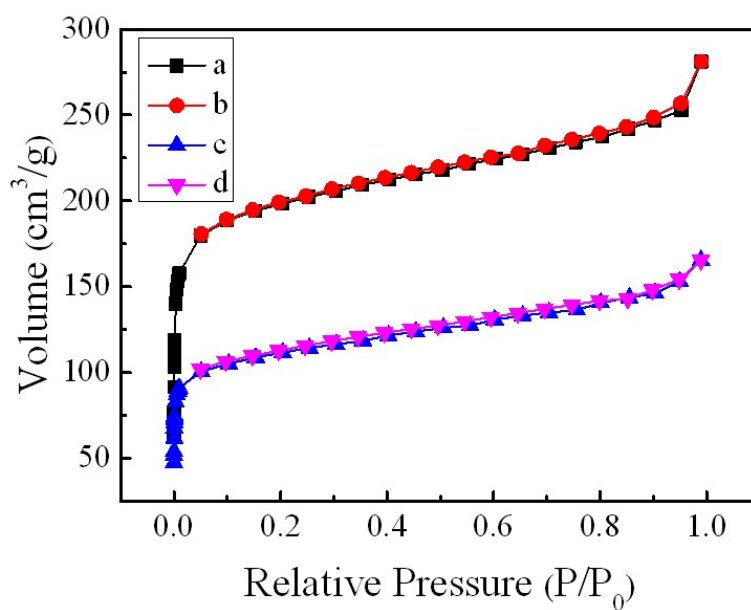

Figure S1. N<sub>2</sub> sorption isotherm of UiO-66 (curve a and b) and UiO-66⊃HDBB (curve c and d).

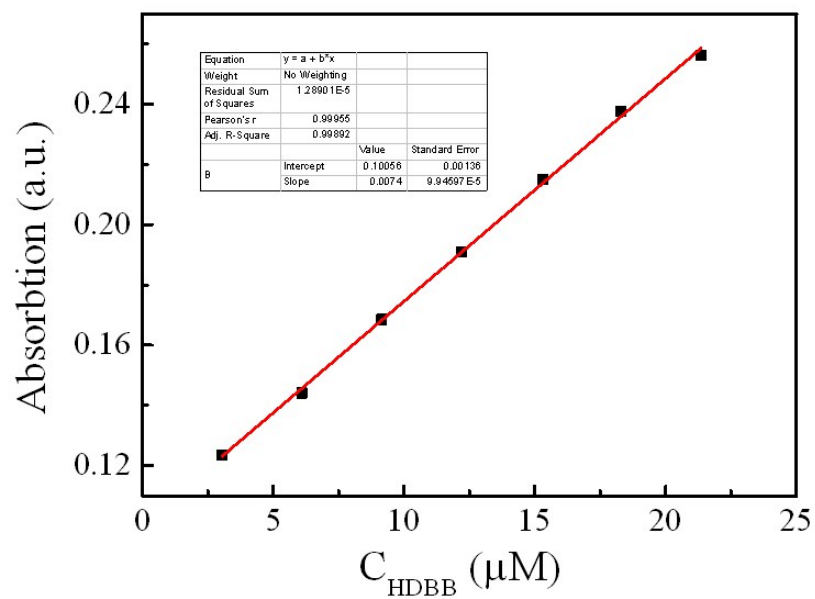

Figure S2. Standard curve of HDBB in pH 12.0 phosphate buffer solution by UV-Vis measurement.

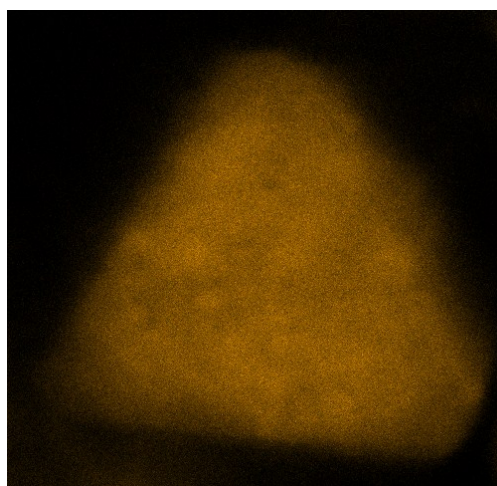

Figure S3. Fluorescence microscopy image of UiO-66@HDBB composite.

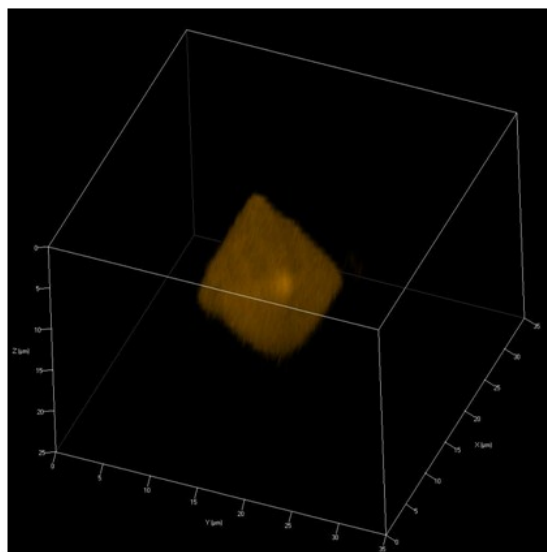

Figure S4. 3D representation of UiO-66@HDBB composite.

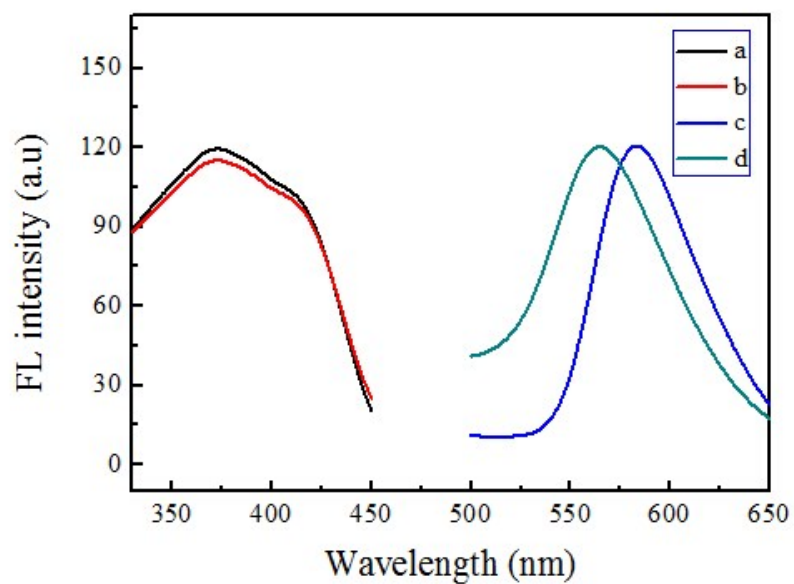

Figure S5. The excitation spectra of (pH= 4, 20  $\mu$ M) HDBB (curve a) and (pH= 4, 0.15 mg/ L ) UiO-66@HDBB (curve b), the fluorescence emission intensity of (pH= 4, 20  $\mu$ M) HDBB (curve c) , and (pH= 4, 0.15 mg/ L ) UiO-66@HDBB (curve d)

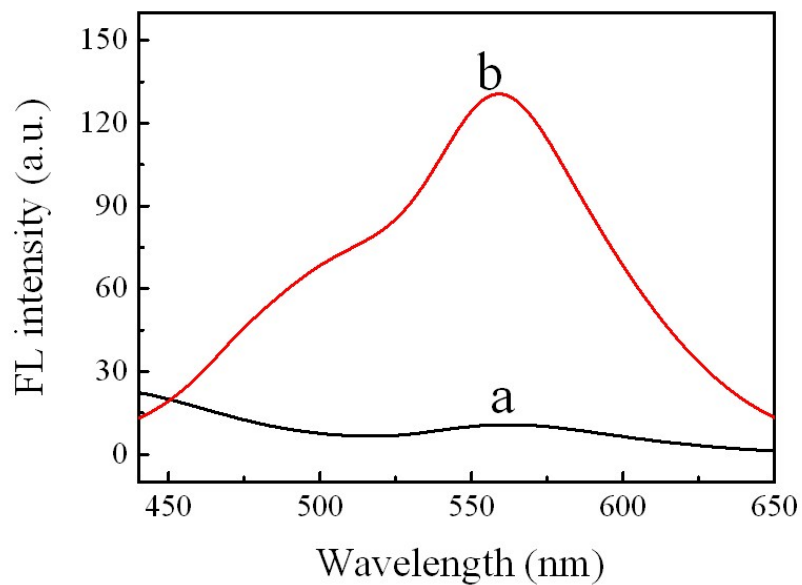

Figure S6. Fluorescence emission spectra of 6  $\mu$ M HDBB (curve a) and 0.1 mg/mL UiO-66@HDBB (curve b) in DMF solution.

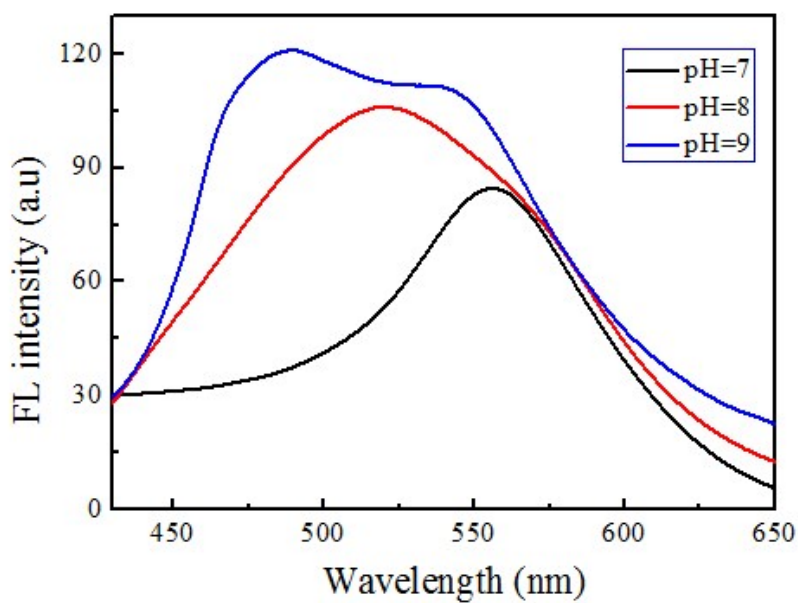

Figure S7. pH-dependent fluorescent spectra of UiO-66@HDBB in the aqueous solutions with pH ranging from 7 to 9 measured under excitation of 365 nm.

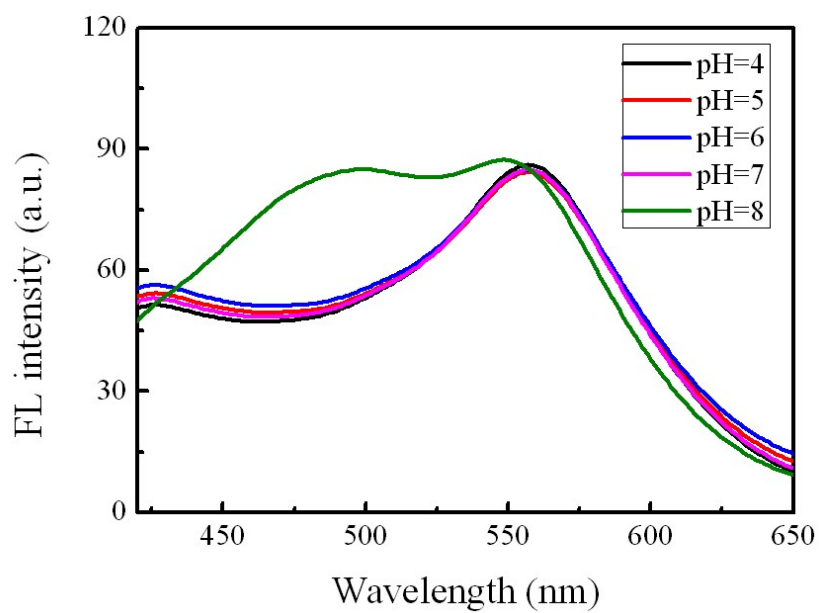

Figure S8. pH dependent fluorescent spectra of UiO-67@HDBB in the aqueous solutions with pH ranging from 4 to 8 measured under excitation of 365 nm.

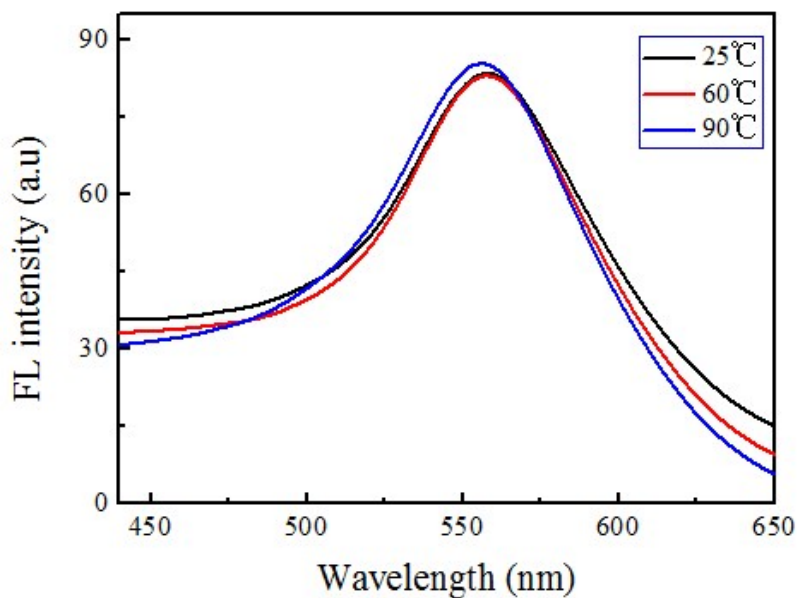

Figure S9. Fluorescence emission spectra of (pH= 4, 0.15 mg/ L ) UiO-66@HDBB in 25 °C、60 °C、90 °C

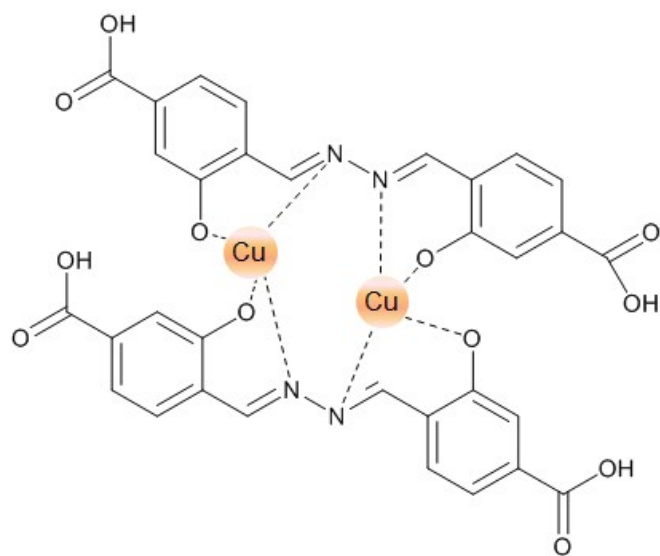

Figure S10. The structure of UiO-66-HDBB ground state complex
